# Supplementary material for: Impact of left atrial appendage thrombus location on diagnostic accuracy of cardiac CT: a single-centre case-control study
Source: HighWire-hosted journal article supplement (doi:10.1136/bmjopen-2023-079876), 2024-01-01
Supplement: bmjopen-2023-079876supp004_data_supplement.pdf [file bmjopen-2023-079876supp004_data_supplement.pdf]

**Table S3** Multivariate analysis of the predictors for false-negative CCT results.

| Characteristics                              | OR (95% CI)               | P value |
|----------------------------------------------|---------------------------|---------|
| Thrombus maximum diameter, per 1 mm decrease | 0.635 (0.459 ~ 0.879)     | 0.006   |
| LAA-ostium thrombus                          | 10.981 (1.702 ~ 70.831)   | 0.012   |
| LAAMFV, per 1 m/s increase                   | 47.926 (0.382 ~ 6014.699) | 0.117   |

**Abbreviations:** CCT = cardiac computer tomography; CI = confidence interval; LAA = left atrial appendage; LAAMFV = left atrial appendage mean flow velocity; OR = odd ratio.
